# Supplementary material for: A Protein Microarray-Based Respiratory Viral Antigen Testing Platform for COVID-19 Surveillance
Source: MDPI journal article supplement (doi:10.3390/biomedicines10092238), 2022-09-09

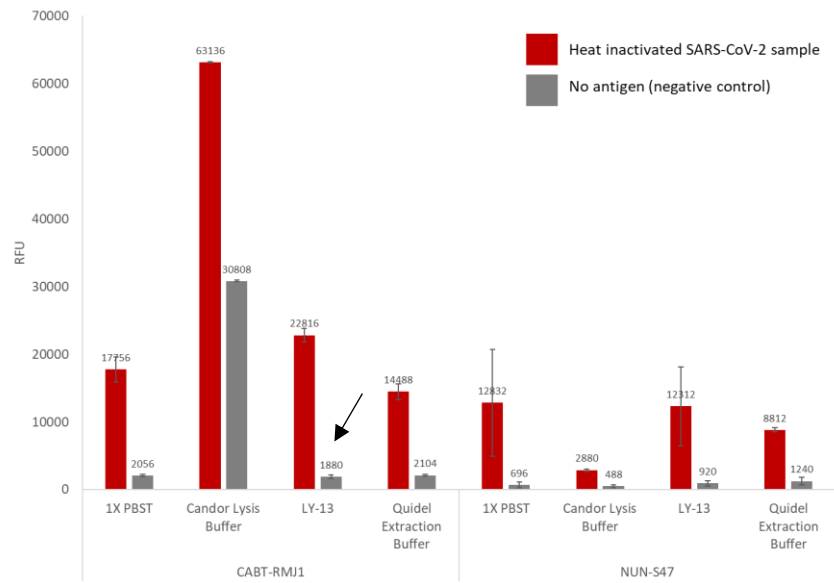

**Figure S1. Test of lysis buffers for the inactivated SARS-CoV-2 sample.** Using the same capture antibody from the pair number 1 from Table S2 (NUN-S46; reagent number 14 Table S1), two detection antibodies (CABT-RMJ1 and NUN-S47; reagent number 13 and 15 Table S1) and four lysis buffers (1X PBST, Candor Lysis Buffer, LY-13, and Quidel Extraction Buffer) were tested against heat inactivated SARS-CoV-2 sample in all possible combinations. The combination of LY-13 and CABT-RMJ1 detection antibody resulted in the highest signal-to-noise ratio (SNR) (black arrow) in the CABT-RMJ1 subgroup with the least variation. A single experiment with two technical replicates were performed. Error bars represent standard deviation from the technical replicates.

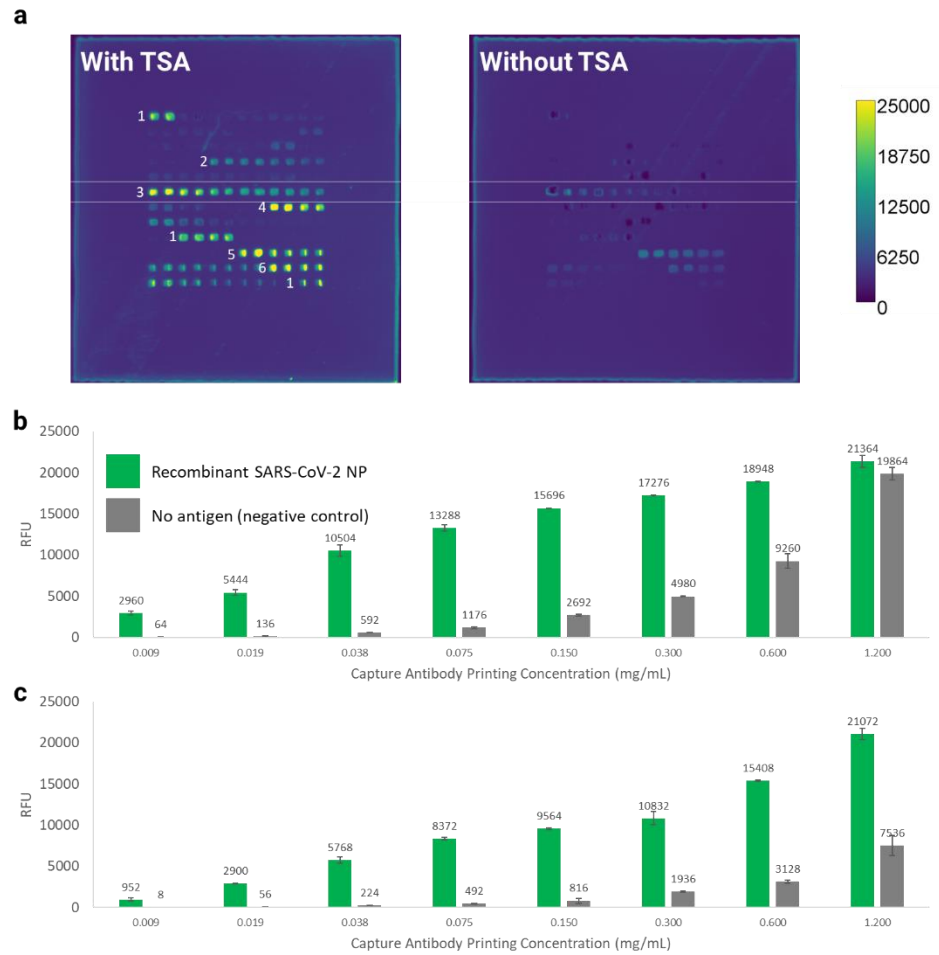

**Figure S2. TSA on the protein microarrays.** Streptavidin-HRP conjugates were used for TSA. The detection scheme to capture SARS-CoV-2 NP using TSA is shown in **Figure 1d**. TSA was performed to compare the fluorescence signals to those from streptavidin-fluorophore approach, shown in **Figure 1c**. The same concentration of the recombinant SARS-CoV-2 NP was tested for TSA and streptavidin-fluorophore approach. (a) Representative pad images between the TSA with Alexa Fluor 488 tyramide reagents treated pad (left) and the streptavidin-Alexa Fluor 488 treated pad (right) are shown. The two white lines indicate the location of the optimal anti-SARS-CoV-2 NP capture antibody (label 3) at different printing concentrations. Each label indicates the following reagents: label 1- fiducials, label 2, 3, 5, and 6 - anti-SARS-CoV-2 NP capture antibodies (reagent number 8, 14, 11, and 12 in **Table S1**, respectively), and label 4 - recombinant SARS-CoV-2 NP. A single experiment with two different tyramide reagent incubation periods were tested. (b) 10-minute incubation and (c) 2-minute incubation are shown. Two technical replicates were performed for each condition. The 2-minute tyramide reagent incubation resulted in the higher SNR ratio than the 10-minute incubation.

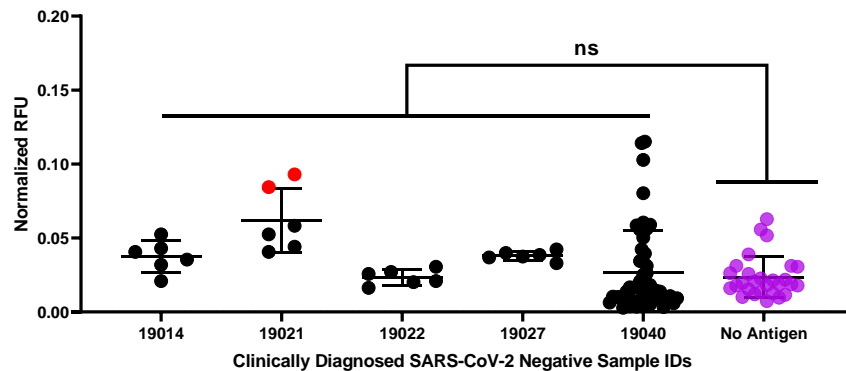

**Figure S3. Negative SARS-CoV-2 clinical sample controls.** A total of 5 negative clinical samples were tested on the protein microarrays. Normalized RFUs from each negative clinical sample were compared to the background (No Antigen) control. One-

way ANOVA, followed by Tukey's multiple comparison test, was performed for statistical analysis. The two data points (red circles) from the sample ID 19021 were excluded from the statistical analysis due to the high fluorescence background on the nitrocellulose pad. No statistical significance was observed between the negative clinical sample and the background (No Antigen) control. The sample ID 19040 was mainly used to calculate the thresholds to test RT-PCR-confirmed positive SARS-CoV-2 clinical samples on the protein microarray. For the sample ID 19014, 19021, 19022, and 19027, a single experiment with six technical replicates were performed. For the sample ID 19040 and the No Antigen control, at least three independent experiments were performed. p-values between the No Antigen control and the sample ID 19014, 19021, 19022, 19027, and 19040 are 0.7303, 0.2727, > 0.9999, 0.6912, and 0.9916, respectively.

**Table S1.** A list of antibodies and recombinant proteins used in this study for antigen detection.

| Reagent Number | Product Name                                                                               | Antibody / Antigen | Antibody Purpose   | Catalog Number | Vendor                   |
|----------------|--------------------------------------------------------------------------------------------|--------------------|--------------------|----------------|--------------------------|
| 1              | SARS-CoV-2 (2019-nCoV) Nucleocapsid-His recombinant Protein                                | Antigen            | NA                 | 40588-V08B     | Sino Biological          |
| 2              | SARS-CoV-2 (2019-nCoV) Spike RBD-His Recombinant Protein                                   | Antigen            | NA                 | 40592-V08B     | Sino Biological          |
| 3              | Influenza A H1N1 (A/California/04/2009) Hemagglutinin / HA Protein (His Tag)               | Antigen            | NA                 | 11055-V08H2    | Sino Biological          |
| 4              | Influenza B (B/Florida/4/2006) Hemagglutinin / HA Protein (His Tag)                        | Antigen            | NA                 | 11053-V08H     | Sino Biological          |
| 5              | Human coronavirus (HCoV-OC43) Nucleocapsid Protein (His Tag)                               | Antigen            | NA                 | 40643-V07E     | Sino Biological          |
| 6              | SARS-CoV-2 (2019-nCoV) Spike Neutralizing Antibody, Mouse Mab                              | Antibody           | Capture Antibody   | 40591-MM43     | Sino Biological          |
| 7              | SARS-CoV/SARS-CoV-2 Spike antibody, Chimeric Mab                                           | Antibody           | Detection Antibody | 40150-D004     | Sino Biological          |
| 8              | SARS-CoV/SARS-CoV-2 Nucleocapsid Antibody, Mouse Mab                                       | Antibody           | Capture Antibody   | 40143-MM05     | Sino Biological          |
| 9              | SARS-CoV/SARS-CoV-2 Nucleocapsid Antibody, Mouse Mab                                       | Antibody           | Capture Antibody   | 40143-MM08     | Sino Biological          |
| 10             | SARS-CoV/SARS-CoV-2 Nucleocapsid Antibody, Rabbit Mab                                      | Antibody           | Detection Antibody | 40143-R001     | Sino Biological          |
| 11             | Anti-SARS-CoV-2 Nucleoprotein monoclonal antibody                                          | Antibody           | Capture Antibody   | CABT-MMB1      | Creative Diagnostics     |
| 12             | Recombinant Anti-SARS-CoV-2 NP monoclonal antibody                                         | Antibody           | Capture Antibody   | CABT-MMB2      | Creative Diagnostics     |
| 13             | Anti-SARS-CoV-2 Nucleoprotein monoclonal antibody                                          | Antibody           | Detection Antibody | CABT-RMJ1      | Creative Diagnostics     |
| 14             | Anti-SARS-CoV-2 Nucleocapsid Antibody, Mouse IgG1 (AS46) (Trehalose free)                  | Antibody           | Capture Antibody   | NUN-S46        | ACRO Biosystems          |
| 15             | Anti-SARS-CoV-2 Nucleocapsid Antibody, Mouse IgG1 (AS47) (Trehalose free)                  | Antibody           | Detection Antibody | NUN-S47        | ACRO Biosystems          |
| 16             | Influenza A Virus Hemagglutinin / HA Antibody, Rabbit MA                                   | Antibody           | Capture Antibody   | 86001-RM01     | Sino Biological          |
| 17             | Influenza B Hemagglutinin / HA Antibody, Mouse Mab                                         | Antibody           | Capture Antibody   | 11053-MM09     | Sino Biological          |
| 18             | Human coronavirus (HCoV-OC43) Nucleocapsid Antibody, Rabbit PAb, Antigen Affinity Purified | Antibody           | Capture Antibody   | 40643-T62      | Sino Biological          |
| 19             | Biotin-SP (long spacer) AffiniPure Goat Anti-Human IgG, Fcγ fragment specific              | Antibody           | Secondary Antibody | 109-065-098    | Jackson ImmunoResearch   |
| 20             | Biotin-SP (long spacer) AffiniPure Goat Anti-Rabbit IgG, Fc fragment specific              | Antibody           | Secondary Antibody | 111-065-046    | Jackson ImmunoResearch   |
| 21             | ChromPure Mouse IgG, whole molecule                                                        | Antibody           | Control Antibody   | 015-000-003    | Jackson ImmunoResearch   |
| 22             | Human IgG Isotype Control                                                                  | Antibody           | Control Antibody   | 12000C         | Thermo Fisher Scientific |

NA: not applicable.

**Table S2.** Summary of SARS-CoV-2 antigen capture and detection antibody pairs to develop sandwich immunoassay on the protein microarray.

| Pair | Capture Antibody Vendor | Capture Antibody Catalog Number | Capture Antibody Printing Concentration (mg/mL) | Antigen Target       |
|------|-------------------------|---------------------------------|-------------------------------------------------|----------------------|
| 1    | Acro Biosystems         | NUN-S46                         | 1.200                                           | SARS-CoV-2 NP        |
| 2    | Creative Diagnostics    | CABT-MMB1                       | 0.600                                           | SARS-CoV-2 NP        |
| 3    | Creative Diagnostics    | CABT-MMB2                       | 1.200                                           | SARS-CoV-2 NP        |
| 4    | Sino Biological         | 40143-MM05                      | 1.690                                           | SARS-CoV-2 NP        |
| 5    | Sino Biological         | 40143-MM08                      | 1.735                                           | SARS-CoV-2 NP        |
| 6    | Sino Biological         | 40591-MM43                      | 1.019                                           | SARS-CoV-2 Spike RBD |

  

| Pair | Detection Antibody Vendor | Detection Antibody Catalog Number | Detection Antibody Probing Concentration (mg/mL) | Secondary Antibody                |
|------|---------------------------|-----------------------------------|--------------------------------------------------|-----------------------------------|
| 1    | Acro Biosystems           | NUN-S47                           | 0.003                                            | NA                                |
| 2    | Acro Biosystems           | NUN-S47                           | 0.003                                            | NA                                |
| 3    | Acro Biosystems           | NUN-S47                           | 0.003                                            | NA                                |
| 4    | Sino Biological           | 40143-R001                        | 0.005                                            | Biotinylated anti-rabbit antibody |
| 5    | Sino Biological           | 40143-R001                        | 0.005                                            | Biotinylated anti-rabbit antibody |
| 6    | Sino Biological           | 40150-D004                        | 0.008                                            | Biotinylated anti-human antibody  |

  

| Pair | Detection Scheme | Total Incubation Time (hr) | Bmax  | K <sub>D</sub> (M) |
|------|------------------|----------------------------|-------|--------------------|
| 1    | Figure 1C        | 2.5                        | 59496 | 7.327E-10          |
| 2    | Figure 1C        | 2.5                        | 52124 | 1.154E-09          |
| 3    | Figure 1C        | 2.5                        | 51497 | 2.693E-09          |
| 4    | Figure 1B        | 3.5                        | 60005 | 2.454E-09          |
| 5    | Figure 1B        | 3.5                        | 47574 | 2.737E-08          |
| 6    | Figure 1B        | 3.5                        | 45567 | 6.463E-12          |

NA: not applicable

RBD: receptor binding domain

The protein microarray chips tested the pairs 4, 5, and 6 were imaged using Perkin Elmer's ScanArray Express HT scanner.

**Table S3.** Summary of clinically diagnosed RT-PCR positive samples.

| Patient ID | Sex | Age | Group   | UTM   | RT-qPCR Kits                                                       | Ct    |
|------------|-----|-----|---------|-------|--------------------------------------------------------------------|-------|
| 18934      | M   | 50Y | Group 1 | Remel | Alinity m SARS-CoV-2 assay / Abbott RealTime SARS-CoV-2 assay      | 5.48  |
| 18812      | M   | 84Y | Group 1 | Hardy | Alinity m SARS-CoV-2 assay / Abbott RealTime SARS-CoV-2 assay      | 9.12  |
| 18880      | F   | 63Y | Group 1 | Remel | Alinity m SARS-CoV-2 assay / Abbott RealTime SARS-CoV-2 assay      | 14.23 |
| 18827      | F   | 62Y | Group 1 | Remel | Alinity m SARS-CoV-2 assay / Abbott RealTime SARS-CoV-2 assay      | 15.67 |
| 18826      | F   | 21Y | Group 1 | Remel | Alinity m SARS-CoV-2 assay / Abbott RealTime SARS-CoV-2 assay      | 17.66 |
| 18930      | M   | 24Y | Group 1 | Remel | Alinity m SARS-CoV-2 assay / Abbott RealTime SARS-CoV-2 assay      | 23.84 |
| 19071      | F   | 56Y | Group 1 | Remel | Alinity m SARS-CoV-2 assay / Abbott RealTime SARS-CoV-2 assay      | 29.91 |
| 19072      | F   | 54Y | Group 1 | Remel | Alinity m SARS-CoV-2 assay / Abbott RealTime SARS-CoV-2 assay      | 31.82 |
| 18958      | M   | 16Y | Group 1 | Remel | Alinity m SARS-CoV-2 assay / Abbott RealTime SARS-CoV-2 assay      | 33.70 |
| 18862      | F   | 49Y | Group 2 | Hardy | Simplexa COVID-19 Direct assay / ABI 7500 Fast Dx SARS-CoV-2 assay | 12.20 |
| 18833      | F   | 33Y | Group 2 | Remel | Simplexa COVID-19 Direct assay / ABI 7500 Fast Dx SARS-CoV-2 assay | 15.10 |
| 18911      | M   | 81Y | Group 2 | Remel | Simplexa COVID-19 Direct assay / ABI 7500 Fast Dx SARS-CoV-2 assay | 14.40 |
| 18879      | M   | 23Y | Group 2 | Remel | Simplexa COVID-19 Direct assay / ABI 7500 Fast Dx SARS-CoV-2 assay | 15.90 |
| 18829      | F   | 48Y | Group 2 | Remel | Simplexa COVID-19 Direct assay / ABI 7500 Fast Dx SARS-CoV-2 assay | 19.40 |
| 18913      | F   | 37Y | Group 2 | Remel | Simplexa COVID-19 Direct assay / ABI 7500 Fast Dx SARS-CoV-2 assay | 19.90 |
| 18959      | M   | 45Y | Group 2 | Remel | Simplexa COVID-19 Direct assay / ABI 7500 Fast Dx SARS-CoV-2 assay | 31.50 |
| 18811      | F   | 33Y | Group 3 | Hardy | Xpert Xpress SARS-CoV-2 test / Xpert Xpress CoV-2/Flu/RSV plus     | 11.70 |
| 18817      | F   | 20Y | Group 3 | Hardy | Xpert Xpress SARS-CoV-2 test / Xpert Xpress CoV-2/Flu/RSV plus     | 15.90 |
| 18834      | F   | 50Y | Group 3 | Remel | Xpert Xpress SARS-CoV-2 test / Xpert Xpress CoV-2/Flu/RSV plus     | 20.10 |
| 18954      | M   | 71Y | Group 3 | Remel | Xpert Xpress SARS-CoV-2 test / Xpert Xpress CoV-2/Flu/RSV plus     | 26.30 |
| 18943      | M   | 52Y | Group 3 | Remel | Xpert Xpress SARS-CoV-2 test / Xpert Xpress CoV-2/Flu/RSV plus     | 27.60 |
| 18960      | F   | 49Y | Group 3 | Remel | Xpert Xpress SARS-CoV-2 test / Xpert Xpress CoV-2/Flu/RSV plus     | 35.40 |

Group 2 assays were tested on Thermo Fisher Applied Biosystems.  
Each clinical sample was tested by one of the two assays indicated in the RT-qPCR Kits column.

**Table S4.** Microarray assay precision against heat inactivated SARS-CoV-2 sample

| Concentration (TCID <sub>50</sub> /mL) | Technical Replicates (n) | Average RFU | Standard Deviation | CV%    |
|----------------------------------------|--------------------------|-------------|--------------------|--------|
| 1.47E+02                               | 2                        | 976         | 91                 | 9.27   |
| 2.81E+02                               | 2                        | 584         | 34                 | 5.81   |
| 5.62E+02                               | 2                        | 836         | 6                  | 0.68   |
| 7.36E+02                               | 2                        | 768         | 181                | 23.57  |
| 1.12E+03                               | 2                        | 524         | 28                 | 5.40   |
| 2.25E+03                               | 2                        | 752         | 23                 | 3.01   |
| 3.68E+03                               | 2                        | 1088        | 272                | 24.96  |
| 4.49E+03                               | 2                        | 744         | 11                 | 1.52   |
| 8.98E+03                               | 2                        | 1416        | 147                | 10.39  |
| 1.80E+04                               | 2                        | 76          | 107                | 141.42 |
| 1.84E+04                               | 2                        | 1048        | 215                | 20.51  |
| 3.59E+04                               | 2                        | 1248        | 385                | 30.82  |
| 7.19E+04                               | 2                        | 1236        | 85                 | 6.87   |
| 9.20E+04                               | 2                        | 1440        | 520                | 36.14  |
| 1.44E+05                               | 2                        | 2208        | 45                 | 2.05   |
| 2.88E+05                               | 2                        | 2720        | 45                 | 1.66   |
| 4.60E+05                               | 2                        | 14608       | 611                | 4.18   |
| 5.75E+05                               | 2                        | 6236        | 730                | 11.70  |
| 1.15E+06                               | 2                        | 19824       | 226                | 1.14   |
| 2.30E+06                               | 4                        | 53014       | 12446              | 23.48  |

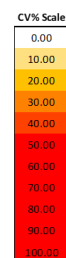

Supplement: s1 [file s1]
